# Supplementary material for: A Population of Deletion Mutants and an Integrated Mapping and Exome-seq Pipeline for Gene Discovery in Maize
Source: PubMed Central journal article supplement (PMC4978893; doi:10.1534/g3.116.030528), 2016-06-01
Supplement: supp_g3.116.030528_FigureS3.pdf [file supp_g3.116.030528_FigureS3.pdf]

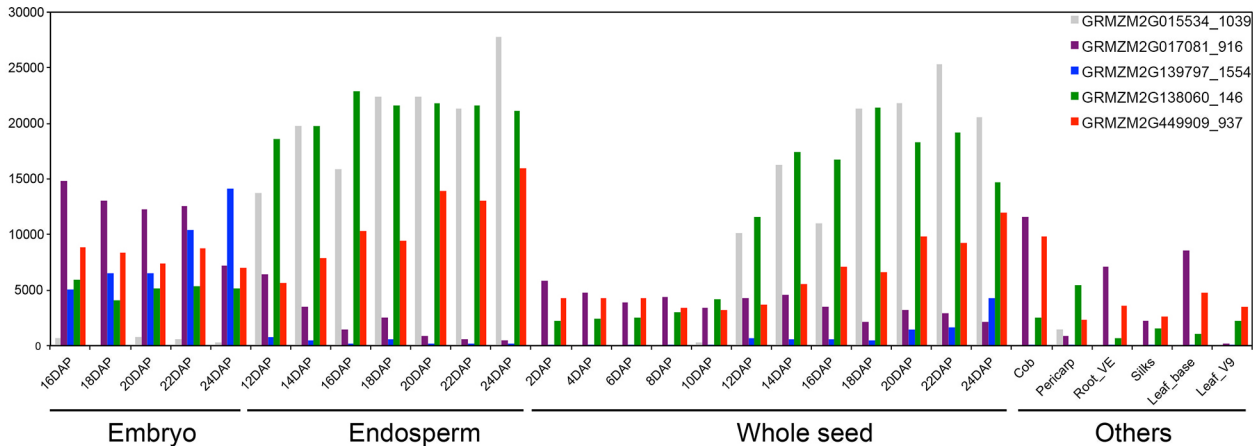

**Figure S3** Tissue specific expression of causative gene candidates. The gene expression was retrieved from the genome-wide tissue transcription by Sekhon et al. (Sekhon et al. 2011). Cob, immature cob at V18; Pericarp, pericarp at 18DAP; Root\_VE, primary root at VE; Silks, silks at R1; Leaf\_base, leaf at base of stage-2; Leaf\_V9, eleventh leaf at V9.
